# Supplementary material for: Pharmacokinetics and Glucodynamics of Ultra Rapid Lispro (URLi) versus Humalog® (Lispro) in Younger Adults and Elderly Patients with Type 1 Diabetes Mellitus: A Randomised Controlled Trial
Source: Springer Nature journal article supplement (doi:10.1007/s40262-020-00903-0), 2020-05-29
Supplement: MOESM1 [file 18032022]

**ELECTRONIC SUPPLEMENTARY MATERIAL (ESM):**

*Clinical Pharmacokinetics*

Pharmacokinetics and Glucodynamics of Ultra Rapid Lispro (URLi) versus Humalog® (Lispro) in Younger Adults and Elderly Patients with Type 1 Diabetes Mellitus: A Randomised Controlled Trial

Helle Linnebjerg, Qianyi Zhang, Elizabeth LaBell, Mary Anne Dellva, David E. Coutant, Ulrike Hövelmann, Leona Plum-Mörschel, Theresa Herbrand, Jennifer Leohr

Corresponding author:

Helle Linnebjerg, MSc, PhD

Eli Lilly and Company, Lilly Corporate Center

Indianapolis, IN 46285

USA

Tel: 317-276-5464

Email: [linnebjerg\\_helle@lilly.com](mailto:linnebjerg_helle@lilly.com)

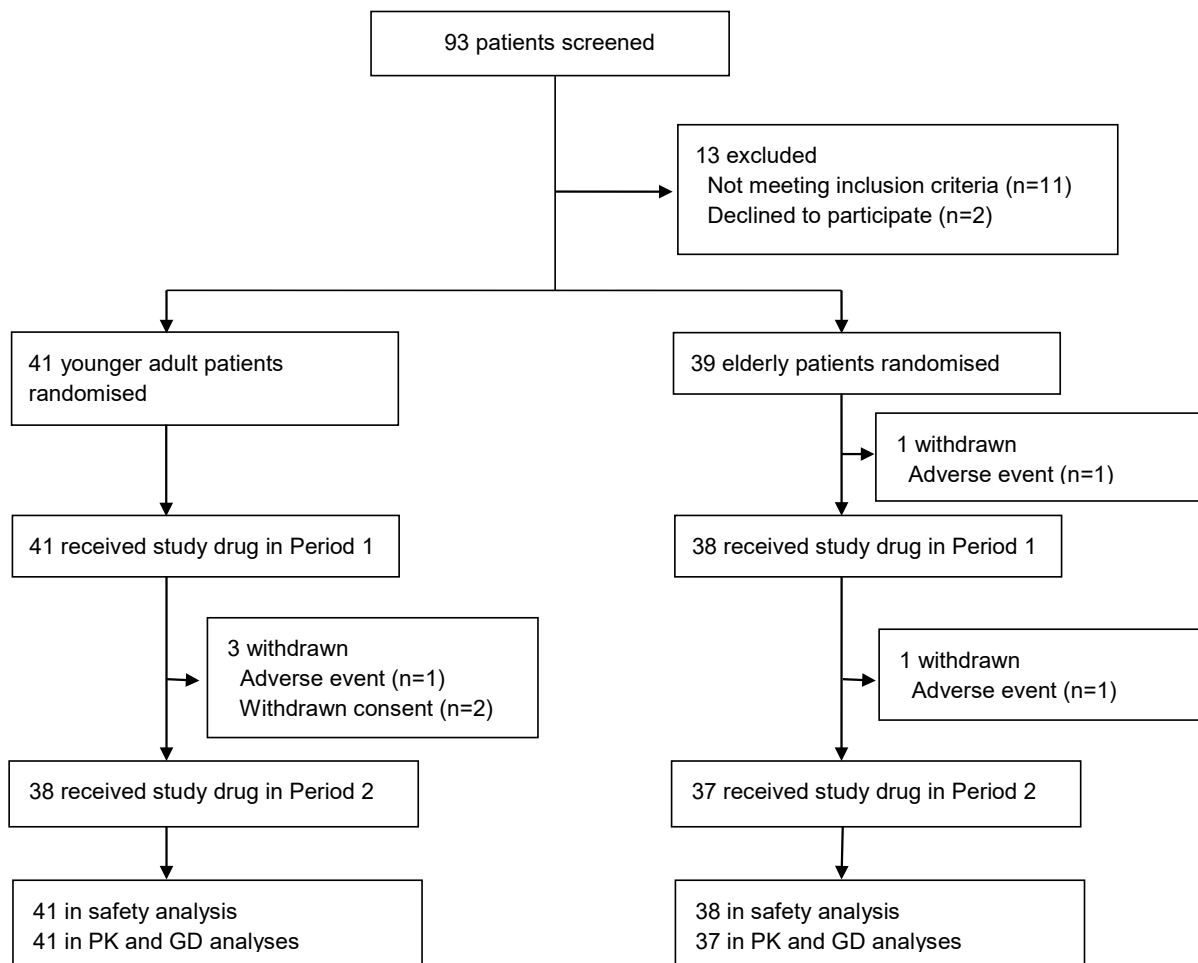

**Supplementary Fig. 1** Patient disposition

*GD* glucodynamic, *PK* pharmacokinetic

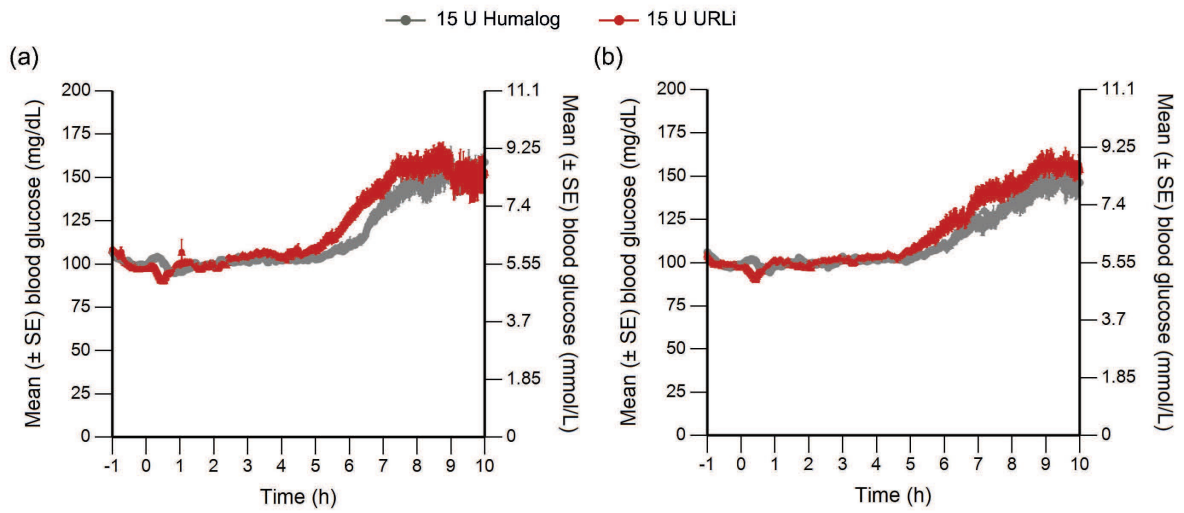

**Supplementary Fig. 2** Mean ( $\pm$ SE) blood glucose concentration profiles during euglycaemic clamp

(a) younger adult patients, and (b) elderly patients.

*h* hour(s), *SE* standard error, U units, *URLi* ultra rapid lispro
